# Supplementary material for: Hierarchical heterostructures of MnO2 nanosheets or nanorods grown on Au-coated Co3O4 porous nanowalls for high-performance pseudocapacitance
Source: Royal Society of Chemistry journal article supplement (doi:10.1039/c3nr34140b), 2013-01-01
Supplement: c3nr34140b.pdf [file c3nr34140b.pdf]

## Electronic Supplementary Information

### **Hierarchical Heterostructures of MnO<sub>2</sub> Nanosheets or Nanorods Grown on Au-Coated Co<sub>3</sub>O<sub>4</sub> Porous Nanowalls for High Performance Pseudocapacitance**

Wenyao Li<sup>‡</sup>, Gao Li<sup>‡</sup>, Jianqing Sun, Rujia Zou, Kaibing Xu, Yangang Sun, Zhigang  
Chen, Jianmao Yang, and Junqing Hu\*

State Key Laboratory for Modification of Chemical Fibers and Polymer Materials,  
College of Materials Science and Engineering, Donghua University, Shanghai 201620,  
China

E-mail: [hu.junqing@dhu.edu.cn](mailto:hu.junqing@dhu.edu.cn)

<sup>‡</sup> These authors contributed equally to the work.

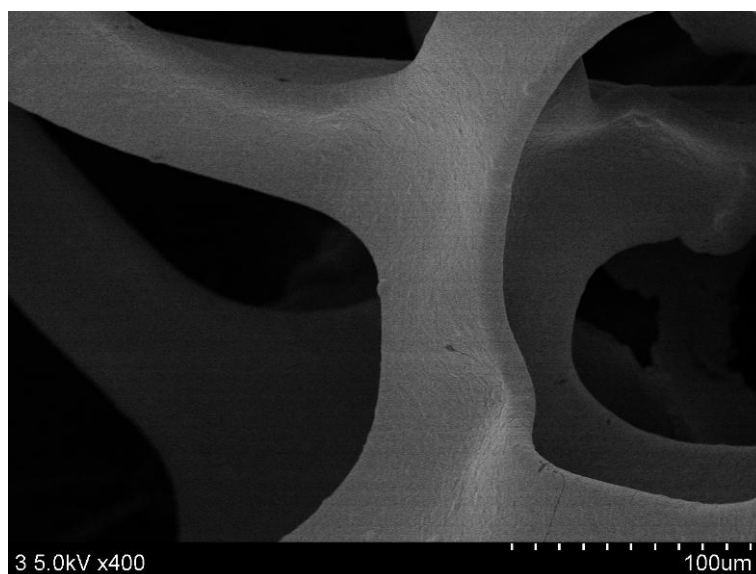

**Fig. S1** Low-magnification SEM image showing as-grown  $\text{Co}_3\text{O}_4$  porous nanowalls on macroporous Ni foam.

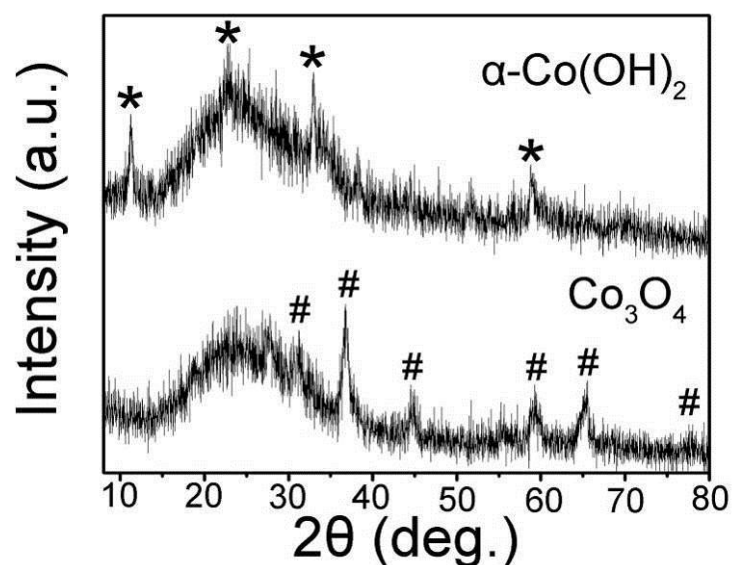

**Fig. S2** XRD patterns demonstrate a transformation of  $\text{Co}(\text{OH})_2$  to  $\text{Co}_3\text{O}_4$  after thermal annealing at 250 °C. The up pattern matches well with that of hexagonal  $\alpha\text{-Co}(\text{OH})_2$  phase by referring to JCPDS card (no.: 74-1057),<sup>1</sup> while the bottom pattern can be indexed to that of cubic  $\text{Co}_3\text{O}_4$  phase by referring to JCPDS card (no.: 43-1003).<sup>2</sup> Here, a broad weak peak (centered at  $2\theta = \sim 25^\circ$ ) of both patterns is due to glass substrate during the XRD measurements.

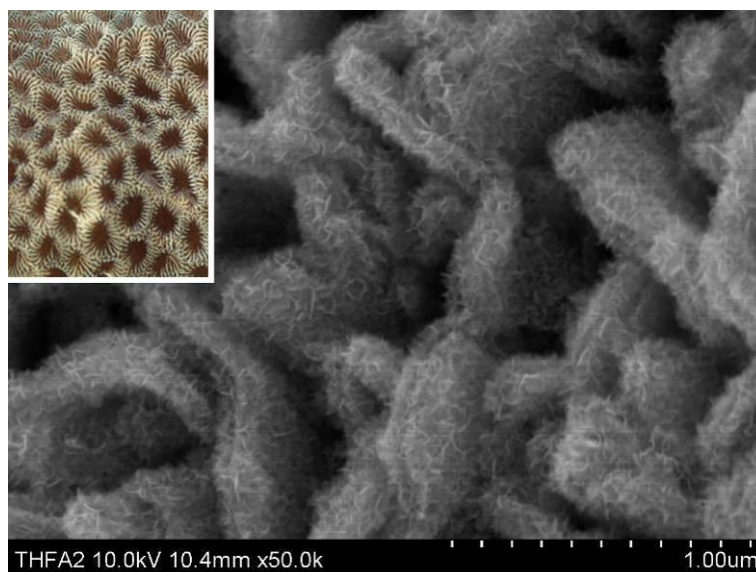

**Fig. S3** High-magnification SEM image of dense and fine MnO<sub>2</sub> nanosheets grown on the Au-coated Co<sub>3</sub>O<sub>4</sub> porous nanowalls, appearing like a kind of coral (an upper-left inset).

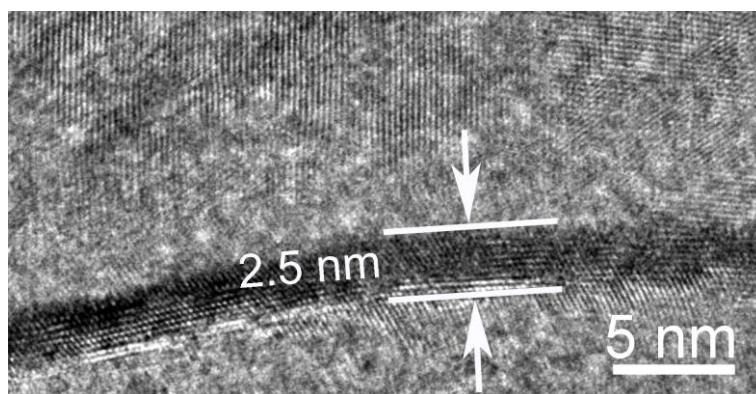

**Fig. S4** HRTEM image shows that as-grown MnO<sub>2</sub> nanosheet is as thin as ~ 2-3 nm.

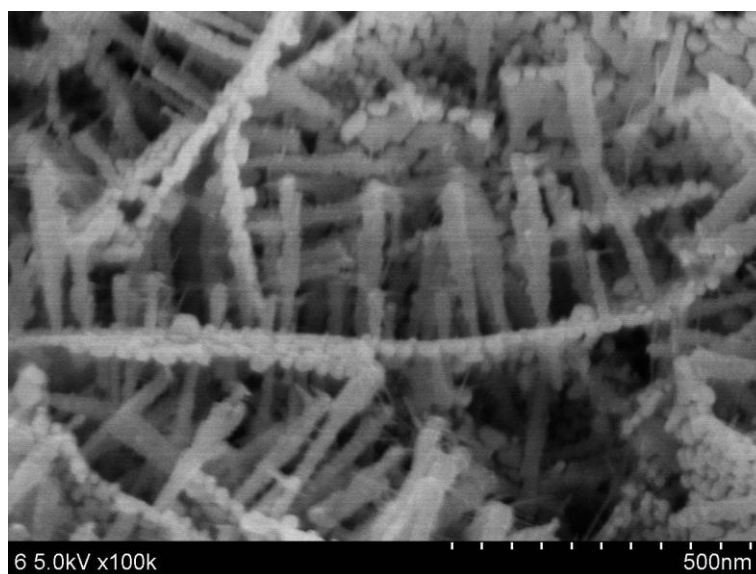

**Fig. S5** High-magnification SEM image of as-grown  $\text{MnO}_2$  nanorods on the Au-coated  $\text{Co}_3\text{O}_4$  nanowall arrays.

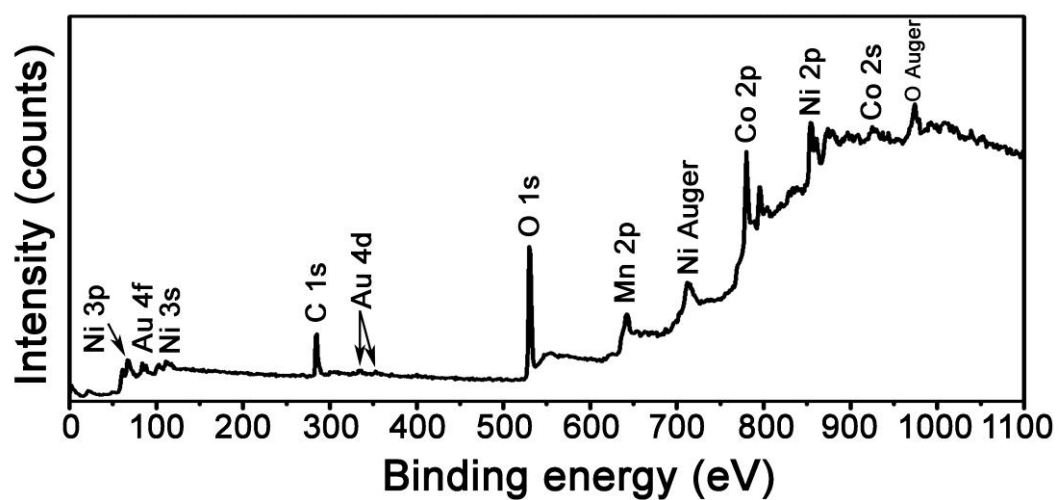

**Fig. S6** XPS spectrum acquired from the  $\text{Co}_3\text{O}_4@Au@MnO_2(\text{NRs})$  hierarchical heterostructures.

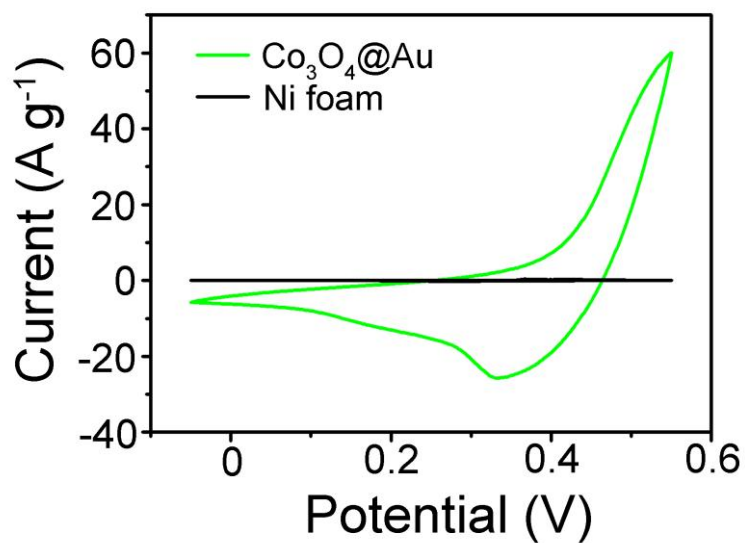

**Fig. S7** CV curves recorded from the Ni foam and as-grown Co<sub>3</sub>O<sub>4</sub> porous nanowalls, respectively, at a scan rate of 50 mV s<sup>-1</sup>.

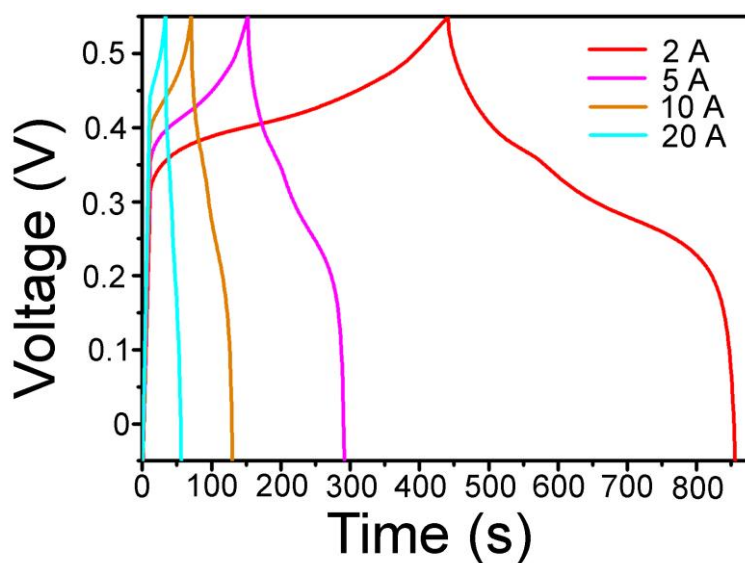

**Fig. S8** Galvanostatic charge-discharge curves of the Co<sub>3</sub>O<sub>4</sub>@Au@MnO<sub>2</sub>(NSs) hierarchical heterostructures at different current densities.

#### Specific capacitance calculation

The specific capacitance of the electrode was calculated from the C-V curves

according to the following equation:<sup>3</sup>

$$C = \frac{Q}{\Delta V * m}$$

where  $C$  ( $F g^{-1}$ ) is the specific capacitance,  $m$  (g) is the mass of the active materials in the electrodes,  $Q$  (C) is an average charge during the charging and discharging processes, and  $\Delta V$  (V) is the potential window.

The discharge specific capacitance is calculated from the discharge curves using the following formula:<sup>3</sup>

$$C = \frac{I * \Delta t}{m * \Delta V}$$

where  $I$  (A),  $\Delta t$  (s),  $m$  (g), and  $\Delta V$  (V) are the discharge current, discharge time consumed in the potential range of  $\Delta V$ , mass of the active materials, and the potential windows, respectively.

The power density and energy density are calculated from the following equations, respectively:<sup>3</sup>

$$E = \frac{1}{2} C * \Delta V^2$$

$$P = \frac{E}{t}$$

where  $P$  ( $kW kg^{-1}$ ),  $C$  ( $F g^{-1}$ ),  $\Delta V$  (V),  $t$  (s), and  $E$  ( $W h kg^{-1}$ ) are the power density, specific capacitance, potential window of discharge, discharge time, and energy density, respectively.

## Reference

- 1 T. Zhao, H. Jiang, J. Ma, *J. Power Sources* 2011, **196**, 860.
- 2 C. Z. Yuan, L. Yang, L. R. Hou, L. F. Shen, X. G. Zhang, X. W. Lou, *Energy Environ. Sci.* 2012, **5**, 7883.
- 3 J. Yan, E. Khoo, A. Sumboja, P. S. Lee, *ACS Nano* 2010, **4**, 4247.
